# Supplementary material for: Creb1 regulates late stage mammalian lung development via respiratory epithelial and mesenchymal-independent mechanisms
Source: PubMed Central journal article supplement (PMC4858709; doi:10.1038/srep25569), 2016-05-06
Supplement: srep25569-s1.pdf [file srep25569-s1.pdf]

# Creb1 regulates late stage mammalian lung development via respiratory epithelial and mesenchymal-independent mechanisms

Antony N, McDougall R.A, Mantamadiotis T, Cole T.J, Bird A.D

## Supplementary Information

### Supplementary Figure S1: Creb1 deletion in *Creb1*<sup>EpKO</sup> and *Creb1*<sup>EndoKO</sup> lungs, and *Creb1*<sup>MesKO</sup> chondrocytes

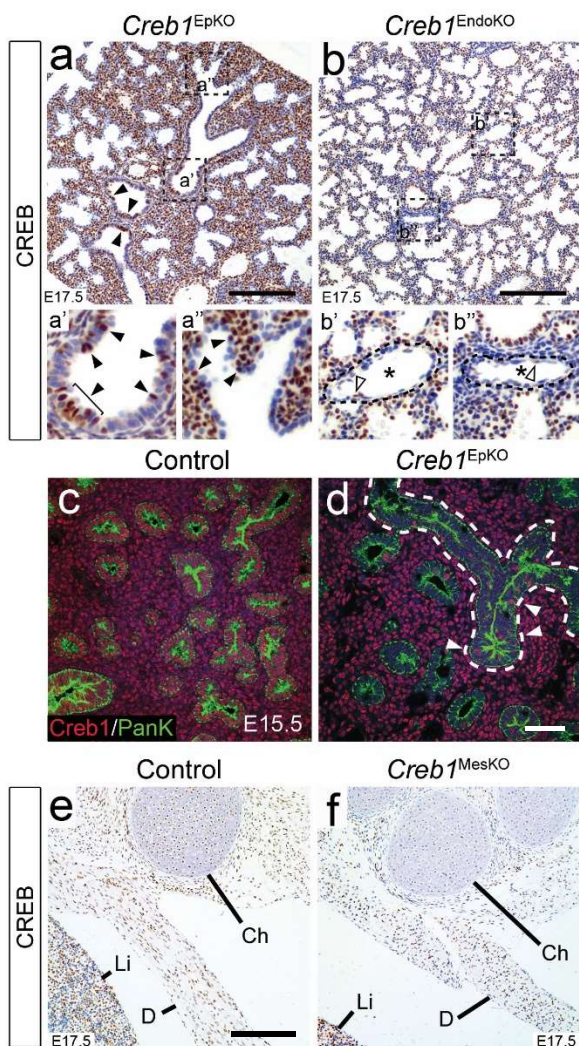

(a) Immunohistochemistry for Creb1 showing variable Creb1 deletion within the proximal epithelium of E17.5 *Creb1*<sup>EpKO</sup> lungs. Boxed areas within the main image are magnified below to show proximal (a') and distal (a'') regions of epithelium, respectively. Arrowheads indicate Creb1-positive cells and cell clusters, the latter shown in a bracketed region in (a').

(b) Immunohistochemistry for Creb1 showing efficient Creb1 deletion in endothelial cells of E17.5 *Creb1*<sup>EndoKO</sup> lungs. Boxed areas within the main image are magnified below to show a pulmonary vein (b') and artery (b''), respectively. The blood vessel lumen is indicated by a "\*" and rare Creb1-positive cells are shown by open arrowheads. (c, d) Double-label immunofluorescence for Creb1 and the epithelial marker pan-keratin (PanK) in E15.5 *Creb1*<sup>EpKO</sup> lungs. Dashed lines in (d) depict a region of proximal-distal epithelium with arrowheads indicating Creb1-positive cells mostly found in the proximal epithelium. (e, f) Immunohistochemistry for Creb1 showing Creb1 deletion in E17.5 *Creb1*<sup>MesKO</sup> ribcage chondrocytes. Sections were cut in the sagittal plane. *Li*: liver, *D*: diaphragm, *Ch*: chondrocytes in ribcage. Scale bars: a, b, e, f; 180  $\mu$ m, c, d; 50  $\mu$ m.

**Supplementary Figure S2: Normal tissue cellularity in lungs of fetal *Creb1*<sup>EpKO</sup> mice**

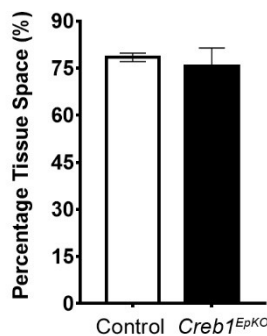

Tissue-to-airspace ratio quantification based on lung sections from E17.5 control ( $n=5$ ) and *Creb1*<sup>EpKO</sup> lungs ( $n=7$ ). *White bars*: Controls, *Black bars*: Conditional Creb1 deletions.

**Supplementary Figure S3: Normal lung development in early postnatal *Creb1*<sup>EpKO</sup> and *Creb1*<sup>MesKO</sup> mice**

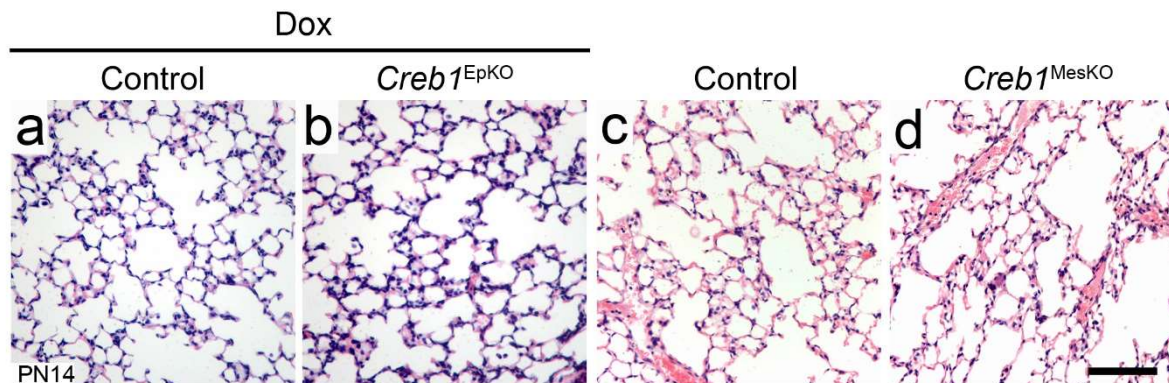

Haematoxylin and eosin-stained tissue sections from PN14 Dox-treated control (a) *Creb1*<sup>EpKO</sup> (b), non-dox treated control (c) and *Creb1*<sup>MesKO</sup> lungs (d). All images are representative of at least three animals per genotype. Scale bar: 180  $\mu$ m.

**Supplementary Figure S4: Unchanged epithelial marker expression in E18.5 *Creb1*<sup>EpKO</sup> and *Creb1*<sup>MesKO</sup> lungs**

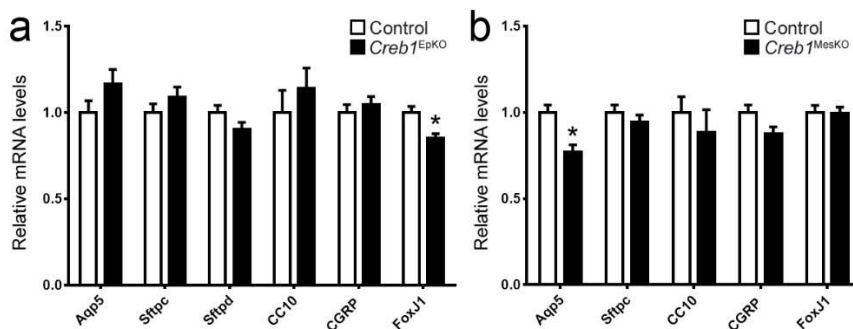

qPCR analysis of proximal and distal epithelial cell markers in (a) E18.5 *Creb1*<sup>EpKO</sup> ( $n=7$ ) and (b) *Creb1*<sup>MesKO</sup> lungs ( $n=6$ ). Error bars represent SEM. Single asterisk (\*) indicates  $p < 0.05$ . White bars: Controls, Black bars: Conditional *Creb1* deletions.

**Supplementary Figure S5: Crem protein is not upregulated in E18.5 *Creb1*<sup>EpKO</sup> and *Creb1*<sup>MesKO</sup> lungs**

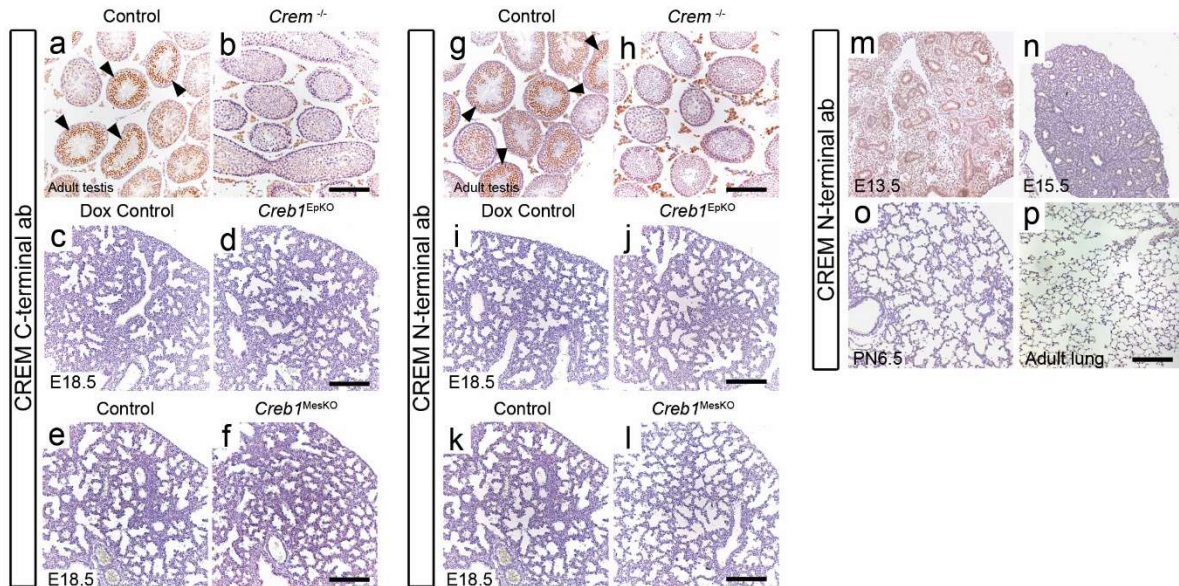

Immunohistochemistry for Crem in wildtype mouse adult testis and lungs from conditional *Creb1* deletions. Immunohistochemistry for C-terminal Crem in wildtype adult mouse testis (a), *Creb1*<sup>-/-</sup> adult mouse testis (b), Dox-treated control E18.5 lung (c), E18.5 *Creb1*<sup>EpKO</sup> lung (d), E18.5 non-dox treated control lung (e) and E18.5 *Creb1*<sup>MesKO</sup> lungs (f). C-terminal Crem expression was observed only in wildtype testes tissue. Immunohistochemistry for N-terminal Crem in wildtype adult mouse testis (g), *Creb1*<sup>-/-</sup> adult mouse testis (h), Dox-treated control E18.5 lung (i), E18.5 *Creb1*<sup>EpKO</sup> lung (j), E18.5 non-dox treated control lung (k) and E18.5 *Creb1*<sup>MesKO</sup> lungs (l). N-terminal Crem expression was observed only in wildtype testes tissue. Immunohistochemistry for N-terminal Crem in lungs from wildtype E13.5 (m), E15.5 (n), PN6.5 (o), Adult (p). N-terminal Crem expression was not detected in lung from any developmental stage. Moderate non-specific C- and N-terminal Crem staining was observed in Leydig cells in (a, b, g, h). Arrowheads indicate Crem-positive nuclei in round spermatids in (a, g). All images are representative of at least three animals per genotype. Scale bars: 180  $\mu$ m.

**Supplementary Figure S6: Normal epithelial differentiation in *Creb1*<sup>MesKO</sup>; *Cre*<sup>-/-</sup> lungs**

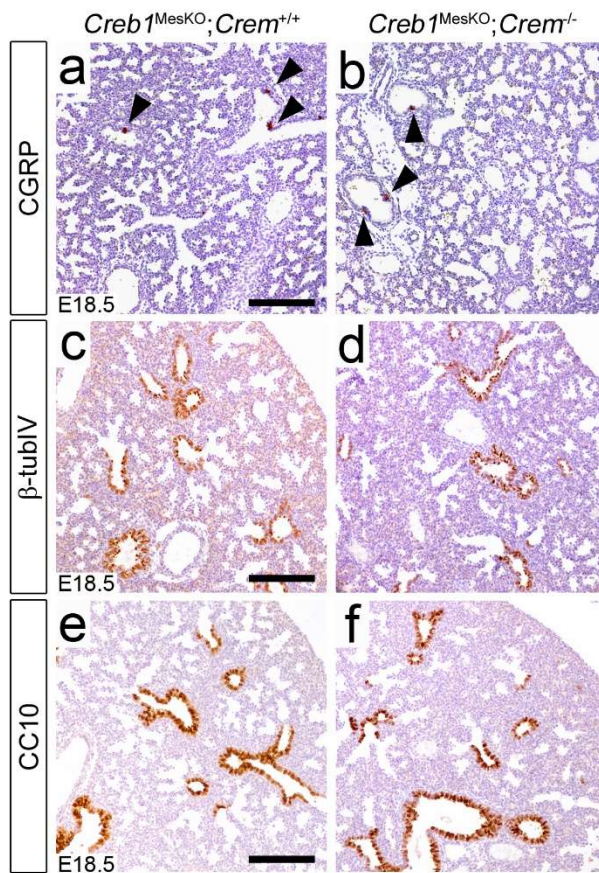

Immunohistochemistry for the proximal epithelial markers CGRP (a,b),  $\beta$ -tubulin IV (c, d), and CC10 (e, f) in E18.5 control and *Creb1*<sup>MesKO</sup>; *Cre*<sup>-/-</sup> lungs. No differences in expression or localization was observed for proximal or epithelial markers. Arrowheads indicate CGRP-positive cells. All images are representative of at least three animals per genotype. Scale bars: 180  $\mu$ m.

### Supplementary Table S1: Genotyping primers

| Allele                       | Sequence                                                                                                                   |
|------------------------------|----------------------------------------------------------------------------------------------------------------------------|
| <i>Crebl<sup>fl</sup></i>    | forward: 5' TATGTAAAGCAAGGGAAGATACTG 3'<br>internal: 5' TAGACATACTTGACCCATAGCATT 3'<br>reverse: 5' GTGATTCCAGCACTCACTCC 3' |
| <i>SPCrtTA<sup>tg</sup></i>  | forward: 5' GACACATATAAGACCCTGGTCA3'<br>reverse: 5' AAAATCTTGCCAGCTTTCCCC 3'                                               |
| <i>TetO-cre<sup>tg</sup></i> | forward: 5' TGCCACGACCAAGTGACAGCAATG 3'<br>reverse: 5' AGAGACGGAAATCCATCGCTCG 3'                                           |
| <i>Crem</i>                  | forward: 5' TGGATTGTGCTGGGAGGTTGTTC 3'<br>internal: 5' CGCCATTCGCCATTCAGGCTG 3'                                            |
| <i>Dermo1<sup>Cre</sup></i>  | forward: 5' AACTTCCTCTCCCGGAGACC 3'<br>internal: 5' TGCCTCTCCAGCTCTTCCTC 3'<br>reverse: 5' CCGGTTATTCAACTTGCACC 3'         |

### Supplementary Table S2: Primary antibodies

| Antibody          | Manufacturer   | Catalogue number | Dilution |
|-------------------|----------------|------------------|----------|
| Creb1             | Cell Signaling | 9197             | 1:800    |
| Ser133-pCreb1     | Cell Signaling | 9198             | 1:50     |
| CD31              | Abcam          | ab28364          | 1:50     |
| CREM (N-terminal) | Santa Cruz     | sc-390425        | 1:2000   |
| CREM (C-terminal) | Genetex        | GTX114146        | 1:800    |
| CGRP              | Sigma-Aldrich  | C8198            | 1:6000   |
| B-tubulin IV      | Abcam          | ab11315          | 1:500    |
| CC10              | Santa Cruz     | sc-9772          | 1:200    |
| ProSPC            | Millipore      | AB3786           | 1:2000   |
| MyHC              | DSHB           | A4.1025          | 1:10     |
| Desmin            | Abcam          | ab86083          | 1:100    |
| GR                | Santa Cruz     | sc-1004          | 1:1000   |
| pan-keratin       | Sigma-Aldrich  | P2871            | IF       |

### Supplementary Table S3: Analysis of survival at two weeks of age in *Crebl<sup>MesKO</sup>*; *Crem<sup>-/-</sup>* mice

| Cross                                                                                                                                                                                       | Litters | Pups | Average litter size | <i>Crebl<sup>fl/fl</sup></i> ; <i>Dermo1<sup>+/+</sup></i> ; <i>Crem<sup>+/-</sup></i> | <i>Crebl<sup>fl/fl</sup></i> ; <i>Dermo1<sup>+/+</sup></i> ; <i>Crem<sup>-/-</sup></i> | <i>Crebl<sup>fl/fl</sup></i> ; <i>Dermo1<sup>cre/+</sup></i> ; <i>Crem<sup>+/-</sup></i> | <i>Crebl<sup>fl/fl</sup></i> ; <i>Dermo1<sup>cre/+</sup></i> ; <i>Crem<sup>-/-</sup></i> |
|---------------------------------------------------------------------------------------------------------------------------------------------------------------------------------------------|---------|------|---------------------|----------------------------------------------------------------------------------------|----------------------------------------------------------------------------------------|------------------------------------------------------------------------------------------|------------------------------------------------------------------------------------------|
| ♂ <i>Crebl<sup>fl/fl</sup></i> ; <i>Dermo1<sup>Cre/+</sup></i> ; <i>Crem<sup>+/-</sup></i><br>×<br>♀ <i>Crebl<sup>fl/fl</sup></i> ; <i>Dermo1<sup>+/+</sup></i> ; <i>Crem<sup>-/-</sup></i> | 3       | 14   | 4.7                 | 6<br>(1.5)                                                                             | 5<br>(1.5)                                                                             | 3<br>(1.5)                                                                               | 0<br>(1.5)                                                                               |

The genotype of the progeny was determined as described in *Materials and Methods* at two weeks of age. The expected number of each genotype is indicated in brackets, and was calculated according to a predicted Mendelian allele inheritance ratio.
